# Supplementary material for: Hypoxia induces DOT1L in articular cartilage to protect against osteoarthritis
Source: PubMed Central journal article supplement (PMC8783684; doi:10.1172/jci.insight.150451), 2021-12-22
Supplement: jciinsight-6-150451-s124.pdf [file jciinsight-6-150451-s124.pdf]

1

# SUPPLEMENTAL INFORMATION

## 2 Supplemental Figure 1

3

**A** >DOT1L; human; range -1000bp to 100bp.

TACCTCAGCCCCCGCAGTAGCTGGGATTACAGGCGCCCGCCACCAGCGCCAGCTAATTTTTGTATTTTAA  
 ATAGAGACAGGGTTTCACCATGTTGGCCAGGCTGATCTCGAACTCCTGACCTCAGGTGATCTTCCCGCCT  
 CGGCCTCACAAAGTGCTGGGATTACAGGCATGAGCCAGGGCTCCTGGCCGTGAGAGGGGGTTTCTCCATG  
 TTGGTCAGGCTGGTCTCGAACTCCTGACCTCAGGTGATCTGCCCCTTGGCCTCCCAAAGTGCTGGGAT  
 TACAGGGGTGAATCACCGCGCCTGGCCTTTTTTTTTTTTTTTTGTACCCAATAAACAGCATTTGTTGTGAA  
 TGAATACTGGACTTGGAGCTACAGCAAGTCTGGACCGTGACTCTTATGGGGGGAAATTCGGATTTTTGG  
 TTTTACTAAGCCGTGTGTGGGGAGGTGTCCGGCGTCTCCTCCTGGGACGGGATTCGAAACCCGCTATCCG  
 ACGGGCCCGCCACAGGGTCTCCCGGGTCCCCGCTTCGGGCCGGCAGTGGGGGAAAGGGTTCGGCCGAG  
 GGCAACCGAGG**ACGTGCGTG**CGTACGTTCTG**GCGTGCCTG**GATTTCGGGCGGGCGGGCAGTCCACGGGGC  
 GGGGCGCCGAGGGGTGGCGCGCGGGTTCGGCCGCTGGGCGGGGGCACGCGCCGGCGTCTTCGCTCC  
 GGGTCCCCTAGCGCGCGGGGGGAGTGGTTCGGCCCGGCCCGGCTCATTGTGCTCGCTTCACGCCGGC  
 CCAAGATGGCGGAGGCGCTGGAGGCCCGGGCCTGTGACTACAAAGAGGGAGTCGGGGGGCCGGGCCGGAC  
 CGGAGCGCGGGCGGGCGGGCGGGCGGGCCGAGGCCAGGCCAGGCCCTCCCTCAGCCTCCCGCCCC  
 TCCCTCCCGCCCCCTCCTCCGCCACCAGCGGCCCGGCCCTCCCCCAACCGCCCGCTAGCATGGTG  
 CGGCGGCCGCGCGCGGACATGGGGGAGAAGCTGGAGCTGAGACTGAAGTCGCCGTGGGGGGTGGAGCC  
 CGCCGTCTACCCGTGGCCGTGCCGGTCT**ACGTG**AGTGCCGCCCTCCACCG

**B** >DOT1L; mouse; range -1000bp to 100bp.

TTCTAGCTCCGGATCCTTCTTTTTGGGGGCTGGCAAGCGCTAGGATGAGGGGTGGGAGCCATCTCCCTAG  
 ATTACATTCACCTCCCATGTAGTCAGGAAGAAGAAGCAGCTATCCAGAAGCGGCTGGTGAGCTGGTGACAG  
 CTCACCTCAAGGTAACCTATTCTCAGAAGTTTTGGGGGGAGGAACTTAAGTATTAGAAGGATTGGAAT  
 GGCCTAAGAAGGAAATAAGTTTGGCTCTGACTCTGTAAAGTTCTGGGCAGGTGAGAGAATAACATTGCT  
 TTGAACTCTTAATTGAGAGCCTCCGACCTATAGGGTCCAATTTGACTGATGATTTATTAATTAACCTATT  
 GCTCACATCTTTAATCCAGCTCTCAGGAGGCAGAGGCAGGTGGATTTTGGTAAATTCGAGGTCAGACTG  
 GTCAACAGAATGAGTTTCTGGACAGCCAGGCACCCCTGTCTCAAAAAAAAAAAAAAAAAAAGCATG  
 TAAATAAACAATAAGCAGATAGGCTAGAAAAGTGAAGAAATAGAAAAGCTAAAGAAGGGGAAAAATGAA  
 AAATGAAAAAAAAAAGAAAGAAAGAAAAAGCCAGAAAAACAGAAAAAGAAAATTGACGGGAAGGGAAGAG  
 AAAGAAAAAGAACAGGAAATGGAAAGAAAAAGCAAGCAAGCGAAGGGACGCGAAGCAAGCCT  
 GTGCAACTGGGATTTGAACTTGACCCCGCTGGTCTCTCTCGCTTTCTCCGAGGGTTTCCCGGGTCC  
 CCGCTTCCGGCTGGCGGCGACGTCGGAGGGCAACCGAGG**ACGTGCGTG**CGCCGCT**GCGTG**CGTAAAGT**GCG**  
**TG**CGTCGGTCGGAGGAGGGCGAGTCCAAGGGG**GCGTGCGTG**CGAGGGGTGGCGCGCGGGCGGGCGGG  
 CGGAGGCTCTGGGCGCGCACCGCCTCTGGCTCCCGCCTCCCGCGCGCGCTCGCCGAGTGGTTCGCG  
 CCGACCCCGGCTCATTGTGCCTTCTCCTCACGCCGGCCAAAGATGGCGGGCGGCTCTAGACGCCCGGG  
 TCTGTGACTCCTACAAAGAGGGGAGCTGGGGCCACACGGGAGCGGGCGGG

**C** >DOT1L; rat; range -1000bp to 100bp.

ATGTATGTTTATGCACCAGATTGCCCTGGTGCATGGAGAGGCCAGAAGAGGGCGTTGGAACCTGGGAAT  
 TCAGTCAGAGATGGTTGTGAGCCGAGGGAGGGCTGGGAATGGAATCTAAGTTCTCTAAAAGAGCAGCC  
 TGTAGTCTTAGCTACTGAACCATCTCTTAACCCATTTGATGATTTTGTTTTTTTCAGTTTGTCTTGCTG  
 TTAGGAATGGTTTTCACTCTGTAGCTCAAGTGGGCTTTGAGTCGTGATCCCTTGCCCTCAGCTTCCCAAGAC  
 CTTGGATTATGGGTCATAGATTCACGGTTTTGTTAGTGTGAACTGCATAGAAAGTCGAAAAATATCTTC  
 AAAAGAATGAAAAGAAGCTAG**GCGTG**GTGGTGCACACCTTTAATCCAGCACTAGGGAGGGAGGCAGAG  
 GCGGGGAATCTTGGTGAATTTGAGGTAAGACTGGTCAACAGAGTAGACGGAGTTCCAGGACAGCCAGGGC  
 TACCGTGTCTCAAAAAAAAAAAAAAAAAACCAATAAGTAAATAACAATAAATAAGTGATAAGATAAAAA  
 AAAGTGAAAAGAGAAACAGAAAAAGAAAAAGCCGGAAAAACAGAAAAAGAAATAGGGACGAGAAGAGAA  
 AGAAAAGGAAAAGGAAAAGAAAAGAAAAAGAAAAGAAAAAGAAAAAGCAAGCAAGCGAGCCT  
 GCGCAACTGGGACTTGAACCTGTCCACCTGGTCTCTCTCGCTTGCCTCAGCAGGGTTTCCCGGGTCC  
 CCGCTTCCGGCTGGCGGTGGCGTCGGAGGGCAACCGAGG**ACGTGCGTG**CGACCCT**GCGTG**CGA**ACGTGCG**  
**TG**CGTCGGCGGGAGGTGGCGAGTCCAAGGGG**GCGTG**CGTACGAGGGGTGGTGCGCGGCGCGGGCGGG  
 CGGAGGCTTTGGGCGCGCACCGCCTCTGGCTCCCGCCTCCCGCGCGCGCGCCAGTGGTTCAGC  
 CCGACCCCGGCTCATTGTGCCTTCTCCTCACGCCGGCCAAAGATGGCGGGCGGCTCTAGACGCCCGGG  
 TCTGTGACTCCTACAAAGAGGGGAGCTGGGGCCACACGGGAGCGGTGGCCG

4 **Supplemental Figure 1** Predicted hypoxia response elements (HREs) in human, mouse and rat  
5 *DOTIL* gene promoters. (A-B-C) Sequences of the human (A), mouse (B) and rat (C) *DOTIL*  
6 gene promoters from 1000 base pairs (bp) upstream of the transcription start site (TSS) to 100  
7 bp downstream of the TSS as determined by the Eukaryotic Promoter Database. HREs with  
8 core consensus sequence 5'-(A/G)CGTG-3', potential binding sites for HIF heterodimers, are  
9 marked with a yellow box. The bp downstream of the TSS are highlighted in grey.



13 **Supplemental Figure 2** Alignment of the human, mouse and rat *DOTIL* gene promoters.  
14 Alignment of the human, mouse and rat sequences of the *DOTIL* gene promoters from 1000  
15 base pairs (bp) upstream of the transcription start site (TSS) to 100 bp downstream of the TSS  
16 as determined by the Eukaryotic Promoter Database. This alignment was performed using  
17 MUSCLE. Hypoxia response elements (HREs) are marked with a yellow box.

18 **Supplemental Figure 3**

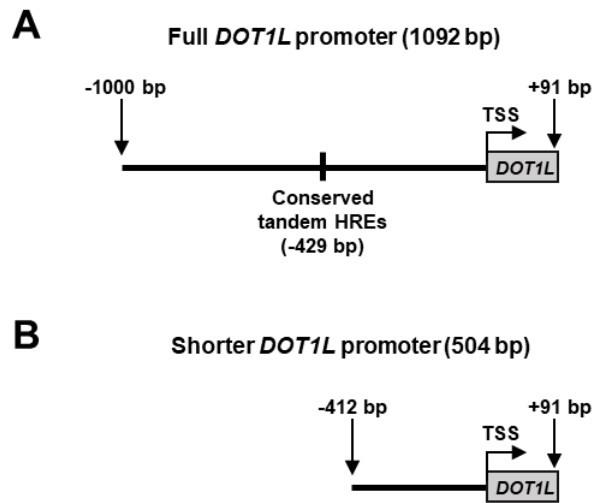

19

20 **Supplemental Figure 3** Promoter constructs for the luciferase reporter assay. (A) The full  
21 human *DOT1L* promoter from 1000 base pairs (bp) upstream to 91 bp downstream relative to  
22 the transcription start site (TSS) as defined by the Eukaryotic Promoter Database was cloned  
23 into the pGL3 basic luciferase reporter vector. This 1092 bp fragment contains the conserved  
24 overlapping tandem Hypoxia response elements (HREs) located at -429 bp relative to the TSS.  
25 (B) The shorter *DOT1L* promoter from 412 bp upstream to 91 bp downstream relative to the  
26 TSS was cloned into the pGL3 basic luciferase reporter vector. This 504 bp fragment does not  
27 contain the conserved overlapping tandem HREs.

28 **Supplemental Figure 4**

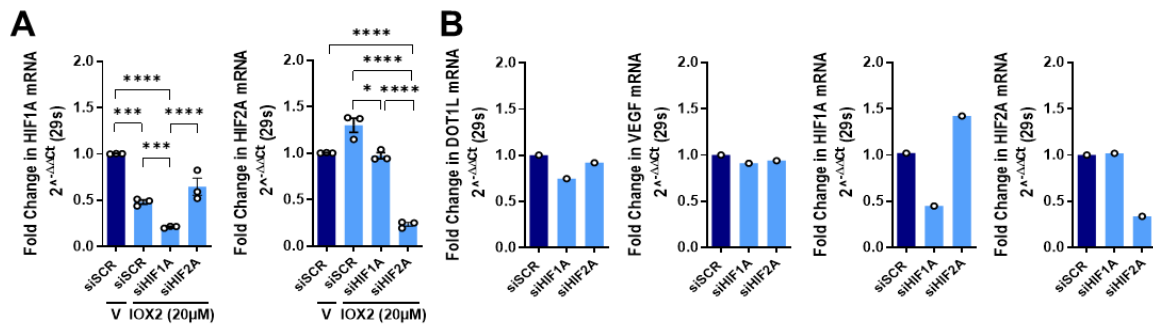

29

30 **Supplemental Figure 4** Efficiency of siRNA-mediated gene silencing in C28/I2 cells. (A)  
 31 Real-time PCR analysis of *HIF1A* and *HIF2A* in human articular chondrocyte C28/I2 cells after  
 32 treatment with hypoxia mimetic IOX2 (20 µM) and siRNA-mediated silencing of *HIF1A*  
 33 (siHIF1A), *HIF2A* (siHIF2A) or scrambled control (siSCR) (n=3, \**p*<0.05, \*\*\**p* <0.001,  
 34 \*\*\*\**p*<0.0001 Sidak-corrected for 6 tests in one-way ANOVA). (B) Real-time PCR analysis  
 35 of *DOT1L*, *VEGF*, *HIF1A* and *HIF2A* in C28/I2 cells after siRNA-mediated silencing of  
 36 *HIF1A*, *HIF2A* or scrambled control (siSCR) (n=1). Bar graphs are mean±sem.

37 **Supplemental Figure 5**

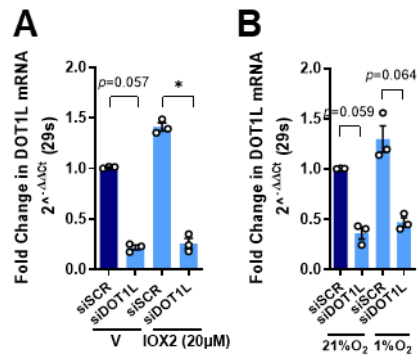

38

39 **Supplemental Figure 5** Efficiency of siRNA-mediated gene silencing in hACs. (A-B) Real-  
40 time PCR analysis of *DOT1L* in primary human articular chondrocytes (hACs) after treatment  
41 with hypoxia mimetic IOX2 (20 μM) or vehicle (V) (A) (n=3, \* $p < 0.05$ , Sidak-corrected for 6  
42 tests in two-way ANOVA) or culturing in hypoxic conditions (1% O<sub>2</sub>) (B) and siRNA-mediated  
43 silencing of *DOT1L* or scrambled control (siSCR) (n=3, Sidak-corrected for 6 tests in two-way  
44 ANOVA). Bar graphs are mean ± sem.

45 **Supplemental Figure 6**

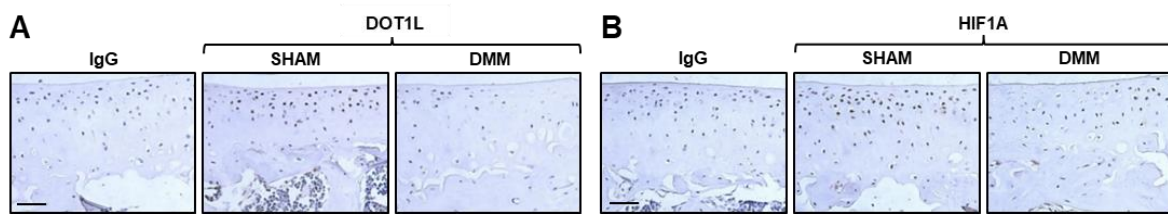

47 **Supplemental Figure 6** DOT1L and HIF-1A protein levels in osteoarthritis murine articular  
48 cartilage. (A-B) Immunohistochemical detection of DOT1L (A) and HIF1A (B) in the articular  
49 cartilage of wild-type mice with OA triggered by destabilisation of the medial meniscus (DMM)  
50 surgery compared to sham operated mice. The images are representative of three different  
51 animals. Scale bar, 50  $\mu$ m.



52 **Supplemental Table 1**53 **Human primers used for qPCR**

| <b>Primer name</b> | <b>Sequence</b>           |
|--------------------|---------------------------|
| <b>hACAN_fw</b>    | ATCCGAGACACCAACGAGAC      |
| <b>hACAN_rv</b>    | CACTCATTGGCTGCTTCCTG      |
| <b>hCOL2A1_fw</b>  | TGGCAGAGATGGAGAACCTG      |
| <b>hCOL2A1_rv</b>  | CATCAAATCCTCCAGCCATC      |
| <b>hDOT1L_fw</b>   | GGATCTCAAGCTCGCTATGG      |
| <b>hDOT1L_rv</b>   | GTCGATGGCACGGTTGTACT      |
| <b>hHIF1A_fw</b>   | TCATCCATGTGACCATGAGG      |
| <b>hHIF1A_rv</b>   | TTCCTCGGCTAGTTAGGGTACA    |
| <b>hHIF2A_fw</b>   | CTGCGACCATGAGGAGATTC      |
| <b>hHIF2A_rv</b>   | GTACGGCCTCTGTTGGTGAC      |
| <b>hS29_fw</b>     | GGGTCACCAGCAGCTGTACT      |
| <b>hS29_rv</b>     | AAACACTGGCGGCACATATT      |
| <b>hTCF1_fw</b>    | CCCCCAACTCTCTCTCTACGA     |
| <b>hTCF1_rv</b>    | TGCCTGAGGTCAGGGAGTAG      |
| <b>hVEGF_fw</b>    | TGCAGATTATGCGGATCAAACC    |
| <b>hVEGF_rv</b>    | TGCATTCACATTTGTTGTGCTGTAG |

54

55 **Supplemental Table 2**56 **Human primers used for ChIP-qPCR**

| <b>Primer name</b>   | <b>Sequence</b>        |
|----------------------|------------------------|
| <b>hDOT1Lprom_fw</b> | CCAATAAACAGCATTGTTGTCG |
| <b>hDOT1Lprom_rv</b> | CCCACACACGGCTTAGTAAAA  |
| <b>hVEGFprom_fw</b>  | TCACTTTCCTGCTCCCTCCT   |
| <b>hVEGFprom_rv</b>  | GCAATGAAGGGGAAGCTCGA   |

57

58 **Supplemental Table 3**59 **Primers used for the PCR amplification for luciferase assay**

| <b>Construct</b>                       | <b>Primer</b> | <b>Sequence</b>             |
|----------------------------------------|---------------|-----------------------------|
| <b>Full DOT1L promoter (1092 bp)</b>   | Forward       | GGTACCTACCTCAGCCCCCGCAGTA   |
|                                        | Reverse       | ACGCTCGAGGCGGCACTCACGTAGACC |
| <b>Shorter DOT1L promoter (504 bp)</b> | Forward       | GGTACCCGTGCGTGCGTGGATTCG    |
|                                        | Reverse       | ACGCTCGAGGCGGCACTCACGTAGACC |

60

61

62 **Supplemental Table 4**

63

**Statistical Analysis Details**

|                           |                                                                                                                                            |                          |                          |                         |                         |                          |                           |
|---------------------------|--------------------------------------------------------------------------------------------------------------------------------------------|--------------------------|--------------------------|-------------------------|-------------------------|--------------------------|---------------------------|
| <b>FIGURE 3A</b>          | Generalized least square model with constant plus power variance function structure                                                        |                          |                          |                         |                         |                          |                           |
| <i>DOT1L</i>              | beta=0.006, t=6.209 $p<0.0001$                                                                                                             |                          |                          |                         |                         |                          |                           |
| <i>VEGF</i>               | beta=0.018, t=10.65 $p<0.0001$                                                                                                             |                          |                          |                         |                         |                          |                           |
| <b>FIGURE 3B</b>          | Generalized least square model with constant plus power variance function structure                                                        |                          |                          |                         |                         |                          |                           |
| <i>DOT1L</i>              | beta=0.015, t=11.14 $p<0.0001$                                                                                                             |                          |                          |                         |                         |                          |                           |
| <i>VEGF</i>               | beta=0.005, t=24.62 $p<0.0001$                                                                                                             |                          |                          |                         |                         |                          |                           |
| <b>FIGURE 3C</b>          | Welch-correct unpaired t-test                                                                                                              |                          |                          |                         |                         |                          |                           |
| <i>DOT1L</i>              | $t_2=4.940$ $p=0.0385$                                                                                                                     |                          |                          |                         |                         |                          |                           |
| <i>VEGF</i>               | $t_2=6.231$ $p=0.0248$                                                                                                                     |                          |                          |                         |                         |                          |                           |
| <b>FIGURE 3F</b>          | Generalized least square model                                                                                                             |                          |                          |                         |                         |                          |                           |
| <i>Immuno-fluorescent</i> | beta=0.007, t=17.32 $p<0.0001$                                                                                                             |                          |                          |                         |                         |                          |                           |
| <b>FIGURE 4A</b>          | Two-way ANOVA                                                                                                                              | V:Empty vs. V:DOT1L      | V:Empty vs. IOX2:Empty   | V:Empty vs. IOX2:DOT1L  | V:DOT1L vs. IOX2:Empty  | V:DOT1L vs. IOX2:DOT1L   | IOX2:Empty vs. IOX2:DOT1L |
| Luciferase activity       | $F_{1,8} = 21.71$ $p=0.0016$ for IOX2 treatment<br>$F_{1,8} = 21.86$ $p=0.0016$ for reporter<br>$F_{1,8} = 1.38$ $p=0.755$ for interaction | $t_8 = 3.078$ $p=0.088$  | $t_8 = 3.067$ $p=0.089$  | $t_8 = 6.601$ $p=0.001$ | $t_8 = 0.0115$ $p=0.99$ | $t_8 = 3.522$ $p=0.046$  | $t_8 = 3.534$ $p=0.045$   |
| <b>FIGURE 4B</b>          | One-way ANOVA                                                                                                                              | siSCRv vs. siSCR         | siSCRv vs. siHIF1A       | siSCRv vs. siHIF2A      | siSCR vs. siHIF1A       | siSCR vs. siHIF2A        | siHIF1A vs. siHIF2A       |
| <i>DOT1L</i>              | $F_{3,8} = 36.28$                                                                                                                          | $t_8 = 9.53$ $p=0.0001$  | $t_8 = 4.426$ $p=0.0132$ | $t_8 = 8.10$ $p=0.0002$ | $t_8 = 5.10$ $p=0.0055$ | $t_8 = 1.427$ $p=0.7207$ | $t_8 = 3.678$ $p=0.0369$  |
| <i>VEGF</i>               | $F_{3,8} = 113.0$                                                                                                                          | $t_8 = 17.25$ $p=0.0001$ | $t_8 = 10.68$ $p<0.0001$ | $t_8 = 14.2$ $p<0.0001$ | $t_8 = 6.57$ $p=0.0011$ | $t_8 = 3.042$ $p=0.0923$ | $t_8 = 3.526$ $p=0.0458$  |
| <b>FIGURE 5A</b>          | Linear mixed model                                                                                                                         |                          |                          |                         |                         |                          |                           |
| <i>DOT1L</i>              | beta=0.01, t=2.73 $p=0.046$                                                                                                                |                          |                          |                         |                         |                          |                           |
| <i>VEGF</i>               | beta=0.023, t=15.71, $p<0.0001$                                                                                                            |                          |                          |                         |                         |                          |                           |

|                  |                                                                                                                                                            |                                       |                                    |                                      |                                      |                                        |                                     |
|------------------|------------------------------------------------------------------------------------------------------------------------------------------------------------|---------------------------------------|------------------------------------|--------------------------------------|--------------------------------------|----------------------------------------|-------------------------------------|
| <b>FIGURE 5B</b> | Paired t-test                                                                                                                                              |                                       |                                    |                                      |                                      |                                        |                                     |
| <i>DOT1L</i>     | $t_2=3.280$ $p=0.0817$                                                                                                                                     |                                       |                                    |                                      |                                      |                                        |                                     |
| <i>VEGF</i>      | $t_2=10.27$ $p=0.0093$                                                                                                                                     |                                       |                                    |                                      |                                      |                                        |                                     |
| <b>FIGURE 5C</b> | Linear mixed model                                                                                                                                         |                                       |                                    |                                      |                                      |                                        |                                     |
| <i>COL2</i>      | beta=0.02, $t=4.27$ , $p=0.0009$                                                                                                                           |                                       |                                    |                                      |                                      |                                        |                                     |
| <i>ACAN</i>      | beta=0.024, $t=4.69$ , $p=0.0007$                                                                                                                          |                                       |                                    |                                      |                                      |                                        |                                     |
| <b>FIGURE 5D</b> | Paired t-test                                                                                                                                              |                                       |                                    |                                      |                                      |                                        |                                     |
| <i>COL2</i>      | $t_2=14.51$ $p=0.0047$                                                                                                                                     |                                       |                                    |                                      |                                      |                                        |                                     |
| <i>ACAN</i>      | $t_2=16.84$ $p=0.0035$                                                                                                                                     |                                       |                                    |                                      |                                      |                                        |                                     |
| <b>FIGURE 5E</b> | Two-way ANOVA                                                                                                                                              | Vehicle-siSCR vs<br>vehicle-siDOT1L   | Vehicle-siSCR vs<br>IOX2-siSCR     | Vehicle-siSCR vs<br>IOX2-siDOT1L     | Vehicle-siDOT1L v<br>IOX2-siSCR      | Vehicle-siDOT1L vs<br>IOX2-siDOT1L     | IOX2-siSCR vs IOX2-<br>siDOT1L      |
| <i>COL2</i>      | $F_{1,2}= 3.378$<br>$p=0.2075$ for IOX2<br>treatment<br>$F_{1,2}= 9.659$ $p=0.089$<br>for DOT1L silencing<br>$F_{1,2}= 3.33$ $p=0.2084$<br>for interaction | $t_2=2.254$ $p=0.6306$                | $t_2=6.480$<br>$p=0.1303$          | $t_2=1.644$ $p=0.8103$               | $t_2=8.734$ $p=0.0747$               | $t_2=3.898$ $p=0.310$                  | $t_2=4.836$ $p=0.218$               |
| <i>ACAN</i>      | $F_{1,2}= 0.768$ $p=0.4732$<br>for IOX2 treatment<br>$F_{1,2}= 25.93$ $p=0.0365$<br>for DOT1L silencing<br>$F_{1,2}= 1.14$ $p=0.3977$<br>for interaction   | $t_2=2.792$ $p=0.496$                 | $t_2=1.343$<br>$p=0.8933$          | $t_2=2.958$ $p=0.461$                | $t_2=4.136$ $p=0.282$                | $t_2=0.1656$ $p=0.9$                   | $t_2=4.301$ $p=0.265$               |
| <i>TCF1</i>      | $F_{1,2}= 31.30$ $p=0.0305$<br>for IOX2 treatment<br>$F_{1,2}= 80.53$ $p=0.0122$<br>for DOT1L silencing<br>$F_{1,2}= 8.81$ $p=0.097$ for<br>interaction    | $t_2=4.880$ $p=0.215$                 | $t_2=3.384$ $p=0.383$              | $t_2=5.694$ $p=0.164$                | $t_2=8.265$ $p=0.083$                | $t_2=0.814$ $p=0.985$                  | $t_2=9.079$ $p=0.069$               |
| <b>FIGURE 5F</b> | Two-way ANOVA                                                                                                                                              | Normoxia-siSCR vs<br>normoxia-siDOT1L | Normoxia-siSCR<br>vs hypoxia-siSCR | Normoxia-siSCR vs<br>hypoxia-siDOT1L | Normoxia- siDOT1<br>vs hypoxia-siSCR | Normoxia-siDOT1L<br>vs hypoxia-siDOT1L | Hypoxia-siSCR vs<br>hypoxia-siDOT1L |
| <i>COL2</i>      | $F_{1,2}= 226.3$ $p=0.0044$<br>for oxygen exposure                                                                                                         | $t_2=3.435$ $p=0.375$                 | $t_2=12.68$<br>$p=0.0364$          | $t_2=9.61$ $p=0.0623$                | $t_2=16.1$ $p=0.0227$                | $t_2=13.04$ $p=0.0344$                 | $t_2=3.07$ $p=0.4383$               |

|                  |                                                                                                                                                                                                      |                                         |                                           |                                        |                                       |                                         |                                        |
|------------------|------------------------------------------------------------------------------------------------------------------------------------------------------------------------------------------------------|-----------------------------------------|-------------------------------------------|----------------------------------------|---------------------------------------|-----------------------------------------|----------------------------------------|
|                  | F <sub>1,2</sub> = 12.95 <i>p</i> =0.069<br>for DOT1L silencing<br>F <sub>1,2</sub> = 0.07 <i>p</i> =0.812 for<br>interaction                                                                        |                                         |                                           |                                        |                                       |                                         |                                        |
| ACAN             | F <sub>1,2</sub> = 158.4 <i>p</i> =0.0063<br>for oxygen exposure<br>F <sub>1,2</sub> = 65.75 <i>p</i> =0.0149<br>for DOT1L silencing<br>F <sub>1,2</sub> = 0.012 <i>p</i> =0.9225<br>for interaction | t <sub>2</sub> =11.0 <i>p</i> =0.0476   | t <sub>2</sub> =15.58<br><i>p</i> =0.0243 | t <sub>2</sub> =4.39 <i>p</i> =0.2555  | t <sub>2</sub> =26.6 <i>p</i> =0.0083 | t <sub>2</sub> =15.43 <i>p</i> =0.0248  | t <sub>2</sub> =11.18 <i>p</i> =0.0456 |
| TCF1             | F <sub>1,2</sub> = 2.609 <i>p</i> =0.2476<br>for oxygen exposure<br>F <sub>1,2</sub> = 130.6 <i>p</i> =0.0076<br>for DOT1L silencing<br>F <sub>1,2</sub> = 9.23 <i>p</i> =0.093 for<br>interaction   | t <sub>2</sub> =5.945 <i>p</i> =0.152   | t <sub>2</sub> =3.553 <i>p</i> =0.357     | t <sub>2</sub> =6.691 <i>p</i> =0.123  | t <sub>2</sub> =9.50 <i>p</i> =0.0637 | t <sub>2</sub> =0.745 <i>p</i> =0.989   | t <sub>2</sub> =10.24 <i>p</i> =0.055  |
| <b>FIGURE 5G</b> | Two-way ANOVA                                                                                                                                                                                        | Normoxia V vs.<br>normoxia EPZ          | Normoxia V vs<br>hypoxia V                | Normoxia-V vs<br>hypoxia EPZ           | Normoxia UPZ vs<br>hypoxia V          | Normoxia EPZ vs<br>hypoxia EPZ          | Hypoxia V vs<br>hypoxia EPZ            |
|                  | F <sub>1,2</sub> = 77.07 <i>p</i> =0.0127<br>for oxygen exposure<br>F <sub>1,2</sub> = 45.62 <i>p</i> =0.0212<br>for EPZ treatment<br>F <sub>1,2</sub> = 16.08 <i>p</i> =0.057<br>for interaction    | t <sub>2</sub> =11.7 <i>p</i> =0.0426   | t <sub>2</sub> =14.55<br><i>p</i> =0.0278 | t <sub>2</sub> =8.528 <i>p</i> =0.078  | t <sub>2</sub> =26.2 <i>p</i> =0.0087 | t <sub>2</sub> =20.22 <i>p</i> =0.0145  | t <sub>2</sub> =6.022 <i>p</i> =0.1487 |
| <b>FIGURE 6B</b> | Kruskal -Wallis                                                                                                                                                                                      | SHAM V vs DMM                           |                                           | DMM V vs DMM IOX2                      |                                       | SHAM V vs DMM IOX2                      |                                        |
| OARSI            | χ <sup>2</sup> =14.297 <i>p</i> =0.0008                                                                                                                                                              | Z=3.09 <i>p</i> =0.002                  |                                           | Z=2.31 <i>p</i> =0.021                 |                                       | Z=2.41 <i>p</i> =0.016                  |                                        |
| <b>FIGURE 6C</b> | Kruskal -Wallis                                                                                                                                                                                      | SHAM V vs DMM V                         |                                           | DMM V vs DMM IOX2                      |                                       | SHAM V vs DMM IOX2                      |                                        |
| osteophyte       | χ <sup>2</sup> =15.36 <i>p</i> =0.0004                                                                                                                                                               | Z=2.71 <i>p</i> =0.0068                 |                                           | Z=2.22 <i>p</i> =0.0267                |                                       | Z=2.71 <i>p</i> =0.0068                 |                                        |
| <b>FIGURE 6D</b> | Kruskal -Wallis                                                                                                                                                                                      | SHAM V vs DMM                           |                                           | DMM V vs DMM IOX2                      |                                       | SHAM V vs DMM IOX2                      |                                        |
| synovitis        | χ <sup>2</sup> =10.93 <i>p</i> =0.0064                                                                                                                                                               | Z=2.57 <i>p</i> =0.01                   |                                           | Z=1.75 <i>p</i> =0.08                  |                                       | Z=1.13 <i>p</i> =0.26                   |                                        |
| <b>FIGURE 6E</b> | One-way ANOVA                                                                                                                                                                                        | SHAM V vs DMM                           |                                           | DMM V vs DMM IOX2                      |                                       | SHAM V vs DMM IOX2                      |                                        |
| HIF1A            | F <sub>2,12</sub> =45.45 <i>p</i> <0.0001                                                                                                                                                            | t <sub>12</sub> =9.533 <i>p</i> <0.0001 |                                           | t <sub>12</sub> =4.909 <i>p</i> =0.001 |                                       | t <sub>12</sub> =4.624 <i>p</i> =0.0018 |                                        |
| DOT1L            | F <sub>2,12</sub> =15.07 <i>p</i> =0.0005                                                                                                                                                            | t <sub>12</sub> =4.574 <i>p</i> =0.0019 |                                           | t <sub>12</sub> =4.917 <i>p</i> =0.001 |                                       | t <sub>12</sub> =0.3435 <i>p</i> =0.98  |                                        |
| H3K79            | F <sub>2,12</sub> =45.12 <i>p</i> <0.0001                                                                                                                                                            | t <sub>12</sub> =7.792 <i>p</i> <0.0001 |                                           | t <sub>12</sub> =8.60 <i>p</i> <0.0001 |                                       | t <sub>12</sub> =0.808 <i>p</i> =0.82   |                                        |

| <b>FIGURE S4A</b> | One-way ANOVA                                                                                                                                               | Vehicle-siSCR vs IOX2-siSCR        | Vehicle-siSCR vs IOX2-siHIF1a   | Vehicle-siSCR vs IOX2-siHIF2a     | IOX2-siSCR vs IOX2-siHIF1a        | IOX2-siSCR vs IOX2-siHIF2a          | IOX2-siHIF1a vs IOX2-siHIF2a     |
|-------------------|-------------------------------------------------------------------------------------------------------------------------------------------------------------|------------------------------------|---------------------------------|-----------------------------------|-----------------------------------|-------------------------------------|----------------------------------|
| <i>HIF1A</i>      | $F_{3,8} = 77.26$                                                                                                                                           | $t_8 = 7.013 p = 0.0007$           | $t_8 = 14.80$<br>$p < 0.0001$   | $t_8 = 4.374 p = 0.0141$          | $t_8 = 7.786 p = 0.0003$          | $t_8 = 2.639 p = 0.1659$            | $t_8 = 10.42 p < 0.0001$         |
| <i>HIF2A</i>      | $F_{3,8} = 191.4$                                                                                                                                           | $t_8 = 3.208 p = 0.0725$           | $t_8 = 0.4094$<br>$p = 0.9992$  | $t_8 = 18.36 p < 0.0001$          | $t_8 = 3.617 p = 0.0402$          | $t_8 = 21.57 p < 0.0001$            | $t_8 = 17.96 p < 0.0001$         |
| <b>FIGURE S5A</b> | Two-way ANOVA                                                                                                                                               | Vehicle-siSCR vs vehicle-siDOT1L   | Vehicle-siSCR vs IOX2-siSCR     | Vehicle-siSCR vs IOX2-siDOT1L     | Vehicle-siDOT1L vs IOX2-siSCR     | Vehicle-siDOT1L vs IOX2-siDOT1L     | IOX2-siSCR vs IOX2-siDOT1L       |
| <i>DOT1L</i>      | $F_{1,2} = 7.730 p = 0.1087$ for IOX2 treatment<br>$F_{1,2} = 140.9 p = 0.0070$ for DOT1L silencing<br>$F_{1,2} = 0.7453 p = 0.4789$ for interaction        | $t_2 = 9.986 p = 0.0578$           | $t_2 = 2.150$<br>$p = 0.6601$   | $t_2 = 9.057 p = 0.0697$          | $t_2 = 12.14 p = 0.0397$          | $t_2 = 0.9286$<br>$p = 0.9727$      | $t_2 = 11.21 p = 0.0463$         |
| <b>FIGURE S5B</b> | Two-way ANOVA                                                                                                                                               | Normoxia-siSCR vs normoxia-siDOT1L | Normoxia-siSCR vs hypoxia-siSCR | Normoxia-siSCR vs hypoxia-siDOT1L | Normoxia-siDOT1L vs hypoxia-siSCR | Normoxia-siDOT1L vs hypoxia-siDOT1L | Hypoxia-siSCR vs hypoxia-siDOT1L |
| <i>DOT1L</i>      | $F_{1,2} = 12.32 p = 0.0725$ for oxygen exposure<br>$F_{1,2} = 91.27 p = 0.0108$ for DOT1L silencing<br>$F_{1,2} = 0.06641$<br>$p = 0.8207$ for interaction | $t_2 = 9.809 p = 0.0599$           | $t_2 = 2.292$<br>$p = 0.6201$   | $t_2 = 7.153 p = 0.1087$          | $t_2 = 12.10$<br>$p = 0.0399$     | $t_2 = 2.656 p = 0.5270$            | $t_2 = 9.445 p = 0.0644$         |
